# 1 **Unearthing New Genomic Markers of Drug Response** 2 **by Improved Measurement of Discriminative Power**

3 Cuong C. Dang, Antonio Peón & Pedro J. Ballester\*

4 Cancer Research Center of Marseille, INSERM U1068, F-13009 Marseille, France; Institut  
5 Paoli-Calmettes, F-13009 Marseille, France; Aix-Marseille Université, F-13284 Marseille,  
6 France; and CNRS UMR7258, F-13009 Marseille, France

7 \*Corresponding author

8 Email addresses:

9 CCD: [cuong.dang@inserm.fr](mailto:cuong.dang@inserm.fr)

10 AP: [antonio.peon@inserm.fr](mailto:antonio.peon@inserm.fr)

11 PJB: [pedro.ballester@inserm.fr](mailto:pedro.ballester@inserm.fr)

## 12 **Abbreviation**

13 wild-type (WT); Genomics of Drug Sensitivity in Cancer (GDSC); Next Generation  
14 Sequencing (NGS); true positive (TP); true negative (TN); false positive (FP); false  
15 negative (FN); Matthews Correlation Coefficient (MCC).

## 16 **Abstract**

### 17 **Background**

18 Oncology drugs are only effective in a small proportion of cancer patients. To make  
19 things worse, our current ability to identify these responsive patients before treatment  
20 is still very limited. Thus, there is a pressing need to discover response markers for  
21 marketed and research oncology drugs in order to improve patient survival, reduce  
22 healthcare costs and enhance success rates in clinical trials. Screening these drugs  
23 against a large panel of cancer cell lines has been recently employed to discover new  
24 genomic markers of *in vitro* drug response, which can now be further evaluated on  
25 more accurate tumour models. However, while the identification of discriminative

26 markers among thousands of candidate drug-gene associations in the data is error-  
27 prone, an appraisal of the effectiveness of such detection task is currently lacking.

## 28 **Results**

29 Here we present a new non-parametric method to measuring the discriminative power  
30 of a drug-gene association. This is enabled by the identification of an auxiliary  
31 threshold posing this task as a binary classification problem. Unlike parametric  
32 statistical tests, the adopted non-parametric test has the advantage of not making  
33 strong assumptions about the data distorting the identification of genomic markers.  
34 Furthermore, we introduce a new benchmark to further validate these markers *in vitro*  
35 using more recent data not used to identify the markers. Thus, the application of this  
36 new methodology has led to the identification of 128 new genomic markers  
37 distributed across 61% of the analysed drugs, including 5 drugs without previously  
38 known markers, which were missed by the MANOVA test initially applied to analyse  
39 data from the Genomics of Drug Sensitivity in Cancer consortium.

## 40 **Introduction**

41 Cancer is a leading cause of morbidity and mortality in industrialised nations, with  
42 failed treatment being often life-threatening. While a wide range of drugs are now  
43 available to treat cancer patients, in practice only a small proportion of them respond  
44 to these drugs [1]. To make things worse, our current ability to identify responsive  
45 patients before treatment is still very limited [2]. This situation has a negative impact  
46 on patient survival (the tumour keeps growing until an effective drug is administered),  
47 healthcare costs (very expensive drugs are ineffective, and thus wasted, on most  
48 cancer patients [1, 3]) and the success rates of oncology clinical trials (10% fall in  
49 Phase II studies, with the number of phase III terminations doubling in recent years

50 [4]). Therefore, there is a pressing need to understand and predict this aspect of  
51 human variation to make therapy safer and more effective by determining which  
52 drugs will be more appropriate for any given patient.

53 The analysis of tumour and germline DNA has been investigated as a way to  
54 personalise cancer therapies for quite some time [5]. However, the recent and  
55 comprehensive flood of new data from much cheaper and faster Next Generation  
56 Sequencing (NGS) technologies along with the maturity of more established  
57 molecular profiling technologies represents an unprecedented opportunity to study the  
58 molecular basis of drug response. These data have shown that drug targets often  
59 present genomic alterations across patient tumours [6]. At the molecular level, these  
60 somatic mutations affect the abundance and function of gene products driving tumour  
61 growth and hence may influence disease outcome and/or response to therapy [7].  
62 Therefore, there is opportunity for genetic information to aid the selection of effective  
63 therapy by relating the molecular profile of tumours to their observed sensitivity to  
64 drugs. Research on the identification of drug-gene associations that can be used as  
65 predictive biomarkers of *in vitro* drug response is carried out on human cancer  
66 tumour-derived cell lines [8–10]. Cell lines allow relatively quick and cheap  
67 experiments that are generally not feasible on more accurate disease models [11].  
68 Here the molecular profile of the untreated cell line is determined and a phenotypic  
69 readout is made to assess the intrinsic cell sensitivity or resistance to the tested drug.  
70 In addition to biomarker discovery [8–10], these data sets have also been used to  
71 enable pharmacogenomic modelling [12–14], pharmacotranscriptomic modelling [15,  
72 16], QSAR modelling [17, 18], drug repositioning [18, 19] and molecular target  
73 identification [19–21], among other applications.

74 Our study focuses on the Genomics of Drug Sensitivity in Cancer (GDSC) data  
75 analysed by Garnett et al. [9] and publicly released after additional curation [22]. The  
76 released data set comprises 638 human tumour cell lines, representing a broad  
77 spectrum of common and rare cancer types. One benefit of looking at a large number  
78 of cell lines is that the pool of data becomes larger, which is beneficial for *in vitro*  
79 biomarker discovery. These authors profiled each cell line for various genetic  
80 abnormalities, including point mutations, gene amplifications, gene deletions,  
81 microsatellite instability, frequently occurring DNA rearrangements and changes in  
82 gene expression. Thereafter, the sensitivity of 130 drugs against these cell lines was  
83 measured with a cell viability assay *in vitro* (cell sensitivity to a drug was summarised  
84 by the half-maximal inhibitory concentration or IC<sub>50</sub> of the drug-cell pair). A p-value  
85 was calculated for 8637 drug-gene associations using a MANOVA test ( $P_{\text{MANOVA}}$ ),  
86 with 396 of those associations being above a FDR=20% Benjamini-Hochberg [23]  
87 adjusted threshold and thus deemed significant (full details in the Methods section).  
88 Overall, it was found that only few drugs had strong genomic markers, with no  
89 actionable mutations being identified for 14 drugs.

90 However, a statistically significant drug-gene association is not necessarily a useful  
91 genomic marker of *in vitro* drug response. Indeed, significant p-values are merely  
92 intended to highlight potential discoveries among thousands of possibilities and thus  
93 their practical importance still have to be evaluated for the problem at hand [24–26].  
94 In this context, this means assessing how well the gene mutation discriminates  
95 between cell lines from an independent test set according their sensitivity to a given  
96 drug. Importantly, while a parametric test such as MANOVA makes strong modelling  
97 assumptions [27] (e.g. normality and equal variances in the distribution of residuals),

98 the distribution of drug responses of the compared groups of cell lines is often  
99 skewed, contain outliers and/or have different variances. Consequently, p-values from  
100 the MANOVA test may lead to two types of errors at the inter-association level, a  
101 false association (type I error or false positive) or a missed association (type II error or  
102 false negative). False negatives are the most worrying types of errors because these  
103 are hard to detect and can have particularly adverse consequences (e.g. missing a  
104 genomic marker able to identify tumours sensitive to a drug for which no marker have  
105 been found yet). Thus, research intended to identify more appropriate statistical  
106 procedures for biomarker discovery on comprehensive pharmacogenomic resources  
107 such as GDSC is crucial to make the most out of these valuable data.

108 Here we will investigate the impact of MANOVA modelling assumptions on the  
109 systematic identification of genomic markers of drug sensitivity on GDSC  
110 pharmacogenomic data. The assessment will be carried out by comparing drug-gene  
111 associations from the MANOVA test with those identified by Pearson's  $\chi^2$  test, which  
112 as a non-parametric test [28] does not make strong modelling assumptions distorting  
113 the detection task. This  $\chi^2$  test is applied to binary classification and hence we propose  
114 here an auxiliary threshold to enable its application to this problem. Furthermore, the  
115 largest discrepancies between both tests on the training data set will be visualised and  
116 discussed with respect to the discriminative power of its significant and non-  
117 significant drug-gene associations. Importantly, we introduce a benchmark using a  
118 more recent GDSC dataset than that employed for the identification of statistically  
119 significant drug-gene associations and use it to validate *in vitro* the single-gene  
120 markers arising from each statistical test. This is timely research because the issue of  
121 systematically validating markers *in vitro* has not been addressed yet and thus it is

122 currently unknown to which extent the limitations of the statistical test affect genomic  
123 marker discovery.

## 124 **Results**

### 125 **Improved measurement of discriminative power by the $\chi^2$ test**

126 Genomic markers of drug response aim at identifying gene alterations that best  
127 discriminate between tumours regarding their sensitivity to a given drug. The  
128 ANOVA family of statistical tests attempts to determine how discriminative is the  
129 gene alteration by comparing the intra-group variances with the inter-group variance,  
130 with the sample variance being considered the optimal procedure to estimate these  
131 variances [29]. In order to measure the discrimination of a marker directly, we  
132 introduce instead an optimal  $IC_{50}$  threshold to define two auxiliary classes of cell  
133 lines, those most sensitive to the drug and those most resistant to the drug, which  
134 permits posing biomarker evaluation as a binary classification problem. Thus, we  
135 characterise each group of cells, i.e. those with the mutated gene and those with the  
136 wild-type (WT) gene, by its median  $IC_{50}$  and define this mutation-dependent threshold  
137 as the mean of both medians (e.g. the dotted red line of the scatter plot in Figure 2A).  
138 This is an optimal definition in that the size of each group and their outliers do not  
139 alter the position of this decision boundary, which is equidistant to both classes and  
140 leads to an intuitive notion of class membership as distance from the threshold.

141 Once this  $IC_{50}$  threshold is calculated, the mutation-based prediction of drug response  
142 of a cell line can be categorised as a true positive (TP), true negative (TN), false  
143 positive (FP) or false negative (FN). These relative measures of drug sensitivity are  
144 only intended to quantify the discrimination between mutated and WT cell lines and  
145 must not be mistaken by absolute measures of drug sensitivity (e.g. a cell line can be

146 defined as sensitive to a drug if its  $IC_{50}$  is better than the median  $IC_{50}$  of all cell lines  
147 for that drug, however such threshold may poorly measure how different are the drug  
148 responses of mutated and WT tumours). From this contingency table at the intra-  
149 association level, the discrimination offered by a drug-gene association can be  
150 summarised by its Matthews Correlation Coefficient (MCC) [30]. Because the  
151 definition of a positive instance depends on whether the somatic mutation is  
152 sensitising or resistant (see the Methods section), MCC can only take values from 0  
153 (gene mutation have absolutely no discriminative power) to 1 (gene mutation  
154 perfectly predicts whether cell lines are sensitive or resistant to the drug).  
155 Furthermore, since cells are now partitioned into four non-overlapping categories with  
156 respect to their response to a drug, the  $\chi^2$  test can be computed from this 2x2  
157 contingency table to identify those drug-gene associations with statistically significant  
158 discriminative power (the  $\chi^2$  statistic measures how far is the contingency table  
159 obtained by the classification method from the values that would be expected by  
160 chance). The process is sketched in Figure 2 and leads to an alternative set of p-values  
161 from the  $\chi^2$  test ( $P_{\chi^2}$ ). To establish which associations are significant according to the  
162  $\chi^2$  test, we also calculated for this case the FDR=20% Benjamini-Hochberg adjusted  
163 threshold (0.00940155). Overall, 403 statistically significant drug-gene associations  
164 were found using the  $\chi^2$  test from the same set of 8637 associations that were  
165 downloaded (i.e. seven significant associations more than with the MANOVA test).  
166 Importantly, only 171 associations of these markers were found by the MANOVA  
167 test. These deviations of the MANOVA test with respect to the results provided by the  
168 non-parametric test will be investigated in the next section to highlight potential false  
169 and missed biomarkers.

170 A last aspect to discuss about the proposed methodology is the duality of MCC and  $\chi^2$ .  
171 In statistics, MCC is known as the  $\phi$  coefficient, which was introduced [31] by Yule in  
172 1912 and later rediscovered [30] by Matthews in 1975 as the MCC (interestingly,  
173 despite being more recent, the MCC has become a much more popular metric for  
174 binary classification than the  $\phi$  coefficient [32–37]). As  $\chi^2 = n \cdot \phi^2$  holds [31], so does  
175  $\chi^2 = n \cdot \text{MCC}^2$  with  $n$  being the number of tested cell lines for the considered drug and  
176 thus MCC will be highly correlated with  $P_{\chi^2}$ . To avoid confusion, we will use  $\phi$  to  
177 refer to discrimination at this intra-association level (i.e. to identify the markers) and  
178 reserve MCC for the validation of the identified markers as a separate binary  
179 classification problem at the inter-association level that we will introduce later. Figure  
180 3A presents the number of drug-gene associations for each number of tested cell lines,  
181 from which it is observed that each drug has only been tested on a subset  $n$  of the 638  
182 cell lines (i.e. gene associations for a given drug will be all evaluated on the same  
183 number of cell lines  $n$ ). Two distinctive groups of drugs emerge: those tested on  
184 around 300 cell lines (red bars) and those tested around 450 cell lines (black bars).  
185 Figure 3B shows that  $\phi$  and  $-\log P_{\chi^2}$  are highly correlated even across different  $n$  (for  
186 associations with the same  $n$ , a perfect Pearson and Spearman correlation is obtained  
187 as expected – data not shown). Given the observed  $\phi$  distribution of  $n$  values, all  
188 markers with an  $\phi$  of 0.15 or more are found unlikely to have arisen by chance. This  
189 connexion is useful in that  $\phi$  is widely used [32–37] but without establishing its  
190 statistical significance for the tackled problem instance.

### 191 **Potential false-positive and false-negative markers of the MANOVA test**

192 We have introduced a new method directly measuring the discriminative power of a  
193 drug-gene association using the  $\phi$  along with its significance using  $P_{\chi^2}$ . We analyse  
194 next those associations where the MANOVA test deviates the most from this non-



195 parametric test. First, we identified the association with the largest difference between  
196  $P_{\text{MANOVA}}$  and  $P_{\chi^2}$  among those not significant by the  $\chi^2$  test. The left scatter plot in  
197 Figure 4 shows that this drug-gene association (GW441756-FLT3) discriminates  
198 poorly between mutant and WT cell lines despite a very low  $P_{\text{MANOVA}} \sim 10^{-10}$ . In  
199 contrast, a high  $P_{\chi^2} \sim 10^{-1}$  is obtained which means that the  $\chi^2$  test rejected this potential  
200 false positive of the MANOVA test.

201 Conversely, to assess the consistency of the MANOVA test, we searched for the drug-  
202 gene association with smallest  $P_{\chi^2}$  among those with a similar  $P_{\text{MANOVA}}$  to that of  
203 GW441756-FLT3, which is Dasatinib-BCR\_ABL (Figure 4 right). The BCR\_ABL  
204 translocation is a highly discriminative marker of Dasatinib sensitivity ( $\phi = 0.65$ ), as  
205 evidenced by the barely overlapping drug response distributions from each set of cell  
206 lines. Note that, whereas the p-value for Dasatinib-BCR\_ABL is of the same  
207 magnitude as that for GW441756-FLT3 using the MANOVA test ( $P_{\text{MANOVA}} \sim 10^{-10}$ ),  
208 the p-values for the same associations using the  $\chi^2$  test are almost 27 orders of  
209 magnitude apart. Thus, unlike the  $\chi^2$  test, the MANOVA test is unable to detect the  
210 extreme difference in discriminative power offered by these two drug-gene  
211 associations.

212 The next experiment consists in searching for the largest discrepancy in the opposite  
213 direction. First, we identified the association with the largest difference between  
214  $P_{\text{MANOVA}}$  and  $P_{\chi^2}$ , this time among those not significant by the MANOVA test. The  
215 left scatter plot in Figure 5 shows marked difference in the two drug response  
216 distributions of this drug-gene association (Dasatinib-CDKN2a.p14), suggesting that  
217 this is a potential false negative of the MANOVA test despite a high  $P_{\text{MANOVA}} \sim 10^{-1}$ . In  
218 contrast, a low  $P_{\chi^2} \sim 10^{-9}$  is obtained, which means that the  $\chi^2$  test detected this  
219 potential false negative of the MANOVA test. Conversely, to assess again the

220 consistency of the MANOVA test, we searched for the drug-gene association with  
221 smallest  $P_{\text{MANOVA}}$  among those with a similar  $P_{\chi^2}$  to that of Dasatinib-CDKN2a.p14,  
222 which is SB590885-BRAF (Figure 5 right). Whereas the p-values for Dasatinib-  
223 CDKN2a.p14 and SB590885-BRAF differ 27 orders of magnitude using the  
224 MANOVA test, the p-values for the same associations have similar p-values using the  
225  $\chi^2$  test ( $P_{\chi^2} \sim 10^{-9}$ ). Thus, unlike the  $\chi^2$  test, the MANOVA test is unable to detect that  
226 both markers have similar discriminative power as also indicated by the MCC  
227 (SB590885-BRAF has a  $\phi$  of 0.29 for 0.35 of Dasatinib-CDKN2a.p14).

### 228 **Validation of single-gene markers on a more recent GDSC data set**

229 We propose a new benchmark based on using the most recent comparable GDSC data  
230 as test sets. For the 127 drugs in common between releases 1 and 5, two non-  
231 overlapping data sets are generated per drug. Training sets from data in release 1  
232 along with their  $\log\text{IC}_{50}$ s for the considered drug, which were used to identify  
233 genomic markers as previously explained. Further, test sets contain the new cell lines  
234 tested with the drug in release 5. Thereafter, the significant drug-gene associations  
235 from each statistical test are evaluated on these test sets. Previously, a cell line  
236 sensitivity threshold was defined to discriminate between those resistant or sensitive  
237 to the considered drug. For each drug, we calculated the threshold as the median of all  
238 the  $\log\text{IC}_{50}$  values from training set cell lines. Consequently, cell lines with  $\log\text{IC}_{50}$   
239 lower than such threshold are sensitive to the drug of interest, whereas those with  
240  $\log\text{IC}_{50}$  higher the threshold are resistant. Lastly, classification performance of a  
241 marker on its test set is summarised with the MCC.

242 Figure 6 presents a comparison between detection methods using this benchmark. The  
243 three compared methods are those based on the  $\chi^2$  test (B), the MANOVA test (C) and  
244 their consensus (A; the association is significant if it is significant by both tests). We

245 can see that the consensus method is the most predictive (full results in additional file  
246 1), followed by associations only significant with the  $\chi^2$  test (additional file 2) and  
247 those only significant by the MANOVA test (additional file 3). These results show  
248 that the overall predictive value of the markers revealed by the  $\chi^2$  test is higher than  
249 that arising from the MANOVA test and also that the consensus of both tests is more  
250 predictive than any of these two tests alone. While most of the markers provide better  
251 prediction than random classification (MCC=0 [38]), their generally low test set MCC  
252 values regardless of the employed detection method highlight how hard is to identify  
253 predictive markers of drug sensitivity.

254 We also use this framework to further validate *in vitro* the markers shown in Figures 4  
255 and 5 as examples. The GW441756-FLT3 marker provides an MCC of 0.10 on the  
256 test despite having weak discriminative power on the training set and hence this is a  
257 false negative of the  $\chi^2$  test. The Dasatinib-BCR\_ABL marker obtains an MCC of  
258 0.21 on the test set. Dasatinib-CDKN2a.p14 provides MCC=0.13 on the test set.  
259 Therefore, the  $\chi^2$  test detected this confirmed false negative of the MANOVA test.  
260 SB590885-BRAF is a true positive of both tests since its MCC on the test set is 0.27.

### 261 **128 new markers unearthed by the $\chi^2$ test and validated *in vitro***

262 The rest of the study will focus on unearthing these missed discoveries using the  $\chi^2$   
263 test and further *in vitro* validation based on a test set made of more recent GDSC data.  
264 Indeed, these new genomic markers constitute additional knowledge that can be  
265 extracted from existing data, i.e. without requiring any further experiment. In the data  
266 released by the GDSC, the 396 genomic markers from the MANOVA test were  
267 distributed among 116 drugs, leaving the remaining 14 drugs without any marker.  
268 Of the 403 single-gene markers identified by the  $\chi^2$  test, 187 were not found by the  
269 MANOVA test and could not be evaluated on the test set because there are only 127

270 drugs in common between the training and test sets and some markers did not have  
271 mutant test set cell lines (i.e. test set MCC cannot be evaluated for these markers  
272 because these yield no prediction). For the same reasons, the situation is similar for  
273 the MANOVA test: only 182 of the 396 MANOVA-significant drug-gene  
274 associations were not found by  $\chi^2$  test and could not be evaluated on the test set.  
275 Further, there are 128 of the 187 associations from the  $\chi^2$  test with test set MCC  
276 greater than zero (115 of the 182 associations from the MANOVA test).

277 Figure 7 shows two examples of new  $\chi^2$  markers for drugs with previously-proposed  
278 MANOVA markers. The scatter plot at the top left identified the mutational status of  
279 CDK2NA as a new marker of sensitivity to Temsirolimus, which was missed by the  
280 MANOVA test. This marker predicts well which cell lines are sensitive to this drug  
281 (MCC of 0.30 on the test set; top right plot). The second example is shown at the  
282 bottom of Figure 7. The EWS\_FLI1 translocation is also a new response marker for  
283 the drug BMS-754807, which was also missed by the MANOVA test. This marker  
284 provides good predictive performance on cell lines not used to identify the markers  
285 (MCC of 0.25 on the test set; bottom right plot). Overall, we have found new markers  
286 unearthed by the  $\chi^2$  test in 77 of the 127 drugs (see additional file 2 ).

287 New genomic markers are particularly valuable in those drugs for which no marker is  
288 known yet. From our analysis, we have also identified seven new markers with MCC  
289 better than random classification for the five drugs for which the MANOVA test did  
290 not find any potential marker [9]: NU-7441, Cyclopamine, BI-2536, Gemcitabine and  
291 Etoposide (see Additional file 2). Figure 8 shows the performance of two of these  
292 markers. On the right, the mutational status of the NOTCH1 gene is the most  
293 discriminative marker for the development drug BI-2536 (MCC=0.23 on the test set).

294 On the left, EWS\_FLI1-positive cell lines exhibit increased sensitivity to  
295 Gemcitabine (MCC=0.18 on the test set).

## 296 **Discussion**

297 To improve the search of genomic markers of drug response, we have presented a new  
298 non-parametric approach that directly measures the discriminative power of a drug-  
299 gene association by posing it as a binary classification problem. This change of  
300 perspective has been enabled by the introduction of an auxiliary threshold that is  
301 optimally tailored to each association. Thus, discrimination can be measured with the  
302  $\chi^2$  statistic and its significance with the  $\chi^2$  test, which provides a better alignment of  
303 the statistical and biological significance of a drug-gene association. Furthermore, we  
304 have shown that, since  $\phi$  is linked to  $\chi^2$ , the significance of a  $\phi$  value can also be  
305 calculated with the  $\chi^2$  test.

306 Next, the  $\chi^2$  test has been applied to the identification of genomic markers from  
307 GDSC data and these markers compared to those arising from the MANOVA test[9].  
308 Unlike the  $\chi^2$  test, statistical tests from the ANOVA family are parametric and thus  
309 expected to lead to inaccuracies when the data do not conform to the underlying  
310 modelling assumptions [27, 28]. Unlike the MANOVA test, the  $\chi^2$  test has the  
311 drawback of requiring the binarisation of  $\log IC_{50}$  values, which leads to all  
312 misclassification errors having the same weight on the  $\chi^2$  statistic regardless of the  
313 magnitude of this error. The largest discrepancies arising from both sets of p-values  
314 have been discussed in detail as shown in Figures 4 and 5, which provide examples of  
315 false negatives of both tests. False positive markers of either test are less important  
316 because they do not represent new knowledge, but resource-consuming false alarms,  
317 and may also become true positives with the arrival of more data.

318 Using the new benchmark, we have carried out a systematic comparison across 8637  
319 drug-gene associations for which a p-value from the MANOVA test had been  
320 calculated in the GDSC study[9]. The MANOVA test highlighted 396 of these  
321 associations as statistically significant, for 403 from the  $\chi^2$  test looking at the same  
322 data. However, only 171 associations were deemed statistically significant by both  
323 tests. Ultimately, we have found that 216 of the 396 MANOVA-significant markers  
324 offer better than random performance. These drug-gene associations are those with  
325 positive MCC in additional files 1 and 3.

326 We have also found that 229 of the 403  $\chi^2$ -significant markers offer better than  
327 random performance. Of these 229, 128 are new markers only detected by the  $\chi^2$  test  
328 (see additional file 2) and hence are false negatives of the MANOVA test.  
329 Temsirolimus-CDK2NA, 17AAG-CDK2NA or BMS-754807-EWS\_FLI1 are among  
330 the most predictive of these new *in vitro* markers. Furthermore, we also identified 7  
331 new markers with MCC better than random classification for the 5 drugs for which  
332 the MANOVA test did not find any marker [9]: NU-7441, Cyclopamine, BI-2536,  
333 Gemcitabine and Etoposide. Overall, the predictive value of the markers revealed  
334 by the  $\chi^2$  test is higher than that arising from the MANOVA test and also that the  
335 consensus of both tests is more predictive than any of these two tests alone (see Figure  
336 6). The former means that the  $\chi^2$  test should be preferred over the MANOVA test for  
337 this problem, the latter showing that the consensus of both tests highlights markers  
338 that are more likely to be predictive than those that are significant by only one of the  
339 tests.

340 Regarding best practices to compare two statistical tests for biomarker discovery, it  
341 could be argued that it is better to base the comparison on the ability of the tests to

342 identify clinical markers. However, there are several reasons why this is inadequate.  
343 First of all, only a fraction of GDSC drugs have FDA-approved markers. Second,  
344 whereas clinical markers are so discriminative that are easily found by both methods,  
345 the challenge is to identify more subtle markers in the data. Indeed, the goal of the  
346 GDSC study was to search for still unknown markers to increase the ratio of patients  
347 that could benefit from personalised treatments (low for most clinical markers) as well  
348 as to find new markers for those drugs without clinical markers. Lastly, a gene  
349 mutation discriminative of *in vitro* drug response may be discriminative of human  
350 drug response, without still having been assessed in the clinic. Thus, a validation  
351 based on comparing the tests on clinical markers will be blind to the MANOVA test  
352 missing these discoveries.

353 Predictive biomarkers are increasingly important tools in drug development and  
354 clinical research [39, 40]. During the development of methods for cancer diagnosis  
355 and treatment, a vast amount of cancer genomics data is now being generated [41] and  
356 thus there is an urgent need for their accurate analysis [42]. In the area of drug  
357 sensitivity marker discovery, recent multilateral efforts have been made [43, 44] to  
358 investigate the consistency of high-throughput pharmacogenomic data, which are  
359 collectively important to promote an optimal use of this valuable data by the relevant  
360 communities [45]. However, the impact of the strong modelling assumptions made by  
361 standard parametric tests on the discovery of genomic markers from data has not been  
362 analysed until now. Therefore, this study is important in a number of ways. First,  
363 these new genomic markers of *in vitro* drug response represent testable hypothesis  
364 that can now be evaluated on more relevant disease models to humans. Second, they  
365 may also constitute further evidence supporting newly proposed oncology targets

366 [46]. Third, beyond the exploitation of these results, the widespread application of this  
367 methodology should lead to the discovery of new predictive biomarkers of *in vitro*  
368 drug response on existing data, as it has been the case here with the GDSC. Indeed,  
369 this new approach has been demonstrated on a large-scale drug screening against  
370 human cancer cell lines, but it can also be applied to other biomarker discovery  
371 problems such as those adopting more accurate disease models (e.g. primary tumours  
372 [47, 48], patient-derived xenografts [49, 50] or patients [51, 52]), those employing  
373 other molecular profiling data (e.g. transcriptomics [53], secretome proteomics [54],  
374 epigenomics [55] or single-cell genomics [56]) or those involving drug combinations  
375 [57]. Looking more broadly, the methodology can also be applied to large-scale drug  
376 screening against human or non-human molecularly-profiled pathogen cultures, such  
377 as those in antibacterial or agricultural research.

## 378 **Methods**

### 379 **GDSC data**

380 From release 1.0 of the Genomics of Drug Sensitivity in Cancer (GDSC) [22], we  
381 downloaded the following data files: `gdsc_manova_input_w1.csv` and  
382 `gdsc_manova_output_w1.csv`.

383 In `gdsc_manova_input_w1.csv`, there are 130 unique drugs as camptothecin was  
384 tested twice, drug ids 195 and 1003, and thus we only kept the instance that was more  
385 broadly tested (i.e. drug ID 1003 on 430 cell lines). Thus, effectively a panel of 130  
386 drugs was tested against 638 cancer cell lines, leading to 47748  $IC_{50}$  values (57.6% of  
387 all possible drug-cell pairs). Downloaded “ $IC_{50}$ ” values are more precisely the natural  
388 logarithm of  $IC_{50}$  in  $\mu M$  units (i.e. negative values represent drug responses more  
389 potent than  $1\mu M$ ). We converted each of these values into their logarithm base 10 in



390  $\mu\text{M}$  units, which we denote as  $\log\text{IC}_{50}$  (e.g.  $\log\text{IC}_{50}=1$  corresponds to  $\text{IC}_{50}=10\mu\text{M}$ ), as  
391 in this way differences between two drug response values are directly given as orders  
392 of magnitude in the molar scale.

393 `gdsc_manova_input_w1.csv` also contains genetic mutation data for 68 cancer genes,  
394 which were selected as the most frequently mutated cancer genes [9], characterising  
395 each of the 638 cell lines. For each gene-cell pair, a 'x::y' description was provided by  
396 the GDSC, where 'x' identifies a coding variant and 'y' indicates copy number  
397 information from SNP6.0 data. As in Garnett et al. [9], a gene for which a mutation is  
398 not detected is considered to be wild-type (wt). A gene mutation is annotated if: a) a  
399 protein sequence variant is detected ( $x \neq \{\text{wt,na}\}$ ) or b) a deletion/amplification is  
400 detected. The latter corresponds to a copy number (cn) variation different from the wt  
401 value of  $y=0 < \text{cn} < 8$ . Furthermore, three translocations were considered (BCR\_ABL,  
402 MLL\_AFF1 and EWS\_FLI1). For each of these gene fusions, cell lines are identified  
403 as fusion not-detected or the identified fusion is given (i.e. wt or mutated with respect  
404 to the gene fusion, respectively). The microsatellite instability (msi) status of each cell  
405 line was also determined. Full details can be found in the original publication [9].

#### 406 **Statistically significant drug-gene associations with the MANOVA test**

407 `gdsc_manova_output_w1.csv` contains 8701 drug-gene associations with p-values. As  
408 we are considering all those involving the 130 unique drugs (i.e. removing the  
409 camptothecin duplicate), we are left with 8637 drug-gene associations with p-values  
410 of which 396 were above a FDR=20% Benjamini-Hochberg adjusted threshold  
411 (0.00840749) and thus deemed significant according to this test. As usual [9], each  
412 statistically significant drug-gene association was considered to be a genomic marker  
413 of *in vitro* drug response.

414 **Measuring the discriminative power of a genomic marker with the  $\chi^2$  test**

415 Let the data for the association between the  $i^{\text{th}}$  drug and the  $j^{\text{th}}$  gene be

$$\mathcal{D}_{ij} = \left\{ \left( \log IC_{50,i}^{(k)}, x_j^{(k)} \right) \right\}_{k=1}^{k=n_i}$$

416 and the sets of mutated and wt cell lines with respect to the  $j^{\text{th}}$  gene,  $MT_j$  and  $WT_j$ , be

$$MT_j = \{k \mid x_j^{(k)} = 1\} \quad WT_j = \{k \mid x_j^{(k)} = 0\}$$

417 Then, the  $\log IC_{50}$  threshold is defined as the mean of the median responses from each

418 set (see subsection “Improved measurement of discriminative power by the  $\chi^2$  test”):

$$thres_{ij} = mean \left( median \left( \left\{ \log IC_{50,i}^{(k)} \right\}_{k \in MT_j} \right) + median \left( \left\{ \log IC_{50,i}^{(k)} \right\}_{k \in WT_j} \right) \right)$$

419 Now if the median response of the  $MT_j$  set is lower (i.e. more sensitive to the drug)

420 than that of the  $WT_j$  set in the considered drug-gene association, then cell lines with

421  $\log IC_{50}$  values lower than the threshold (by this definition, cell lines sensitive to the

422 drug) are positives and those with  $\log IC_{50}$  values higher or equal than the threshold (i.e.

423 cell lines resistant to the drug) are negatives. Conversely, if the median of the  $WT_j$  set

424 is the lowest, then the positives are resistant cell lines and the negatives are sensitive

425 cell lines. These cases correspond to candidate genomic markers of drug sensitivity

426 and resistance, respectively.

427 At this point, the set of all the cell lines tested with a given drug can be partitioned

428 into four categories as defined in Figure 2: true positive (TP), true negative (TN),

429 false positive (FP) or false negative (FN). From this contingency table, the

430 discrimination offered by a drug-gene association can be summarised by the

431 Matthews Correlation Coefficient (MCC) [30]

$$MCC = \frac{TP \cdot TN - FP \cdot FN}{\sqrt{(TP + FN) \cdot (FN + TN) \cdot (TN + FP) \cdot (FP + TP)}}$$

432 By the above definition of positives and negatives, MCC can only take values from 0  
433 (gene mutation have absolutely no discriminative power) to 1 (gene mutation  
434 perfectly predicts whether cell lines are sensitive or resistant to the drug). Also, note  
435 that both the definition of the  $\log IC_{50}$  threshold and the existence of mutated and wt  
436 cell lines in every association guarantees a non-zero value of the denominator in the  
437 MCC formula and thus MCC is always defined in this study. As previously explained,  
438 we report MCC as  $\phi$  whenever this is calculated with the mutation-dependent  
439 threshold on training data (i.e. GDSC release 1.0).

#### 440 **Statistically significant drug-gene associations with the $\chi^2$ test**

441 For each of the 8637 drug-gene associations, the  $\chi^2$  test was computed from the 2x2  
442 contingency table [29] to identify those drug-gene associations with statistically  
443 significant discriminative power. The formula to compute the  $\chi^2$  statistic is

$$\chi^2 = \sum_{l=1}^2 \sum_{m=1}^2 \frac{(O_{lm} - E_{lm})^2}{E_{lm}}$$

444 where  $O_{lm}$  are the four categories in the table (TP,TN,FN,FP) and  $E_{lm}$  are the  
445 corresponding expected values under the null hypothesis that this partition has arisen  
446 by chance. Thus, expected values are calculated with

$$E_{11} = E(TP) = PP \cdot \frac{OP}{n} \quad E_{12} = E(FN) = PN \cdot \frac{OP}{n}$$
$$E_{21} = E(FP) = PP \cdot \frac{ON}{n} \quad E_{22} = E(TN) = PN \cdot \frac{ON}{n}$$

447 For instance, the expected value of TP,  $E(TP)$ , is the number of predicted positives  
448 (PP) times the probability of a cell being a positive given as the proportion of  
449 observed positives (OP) in the  $n$  tested cells.

450 This  $\chi^2$  statistic follows a  $\chi^2$  distribution with one degree of freedom and thus each p-  
451 value was computed with the R package *pchisq* from its corresponding  $\chi^2$  value,  $\chi_0^2$ , as

$$P_{\chi^2} = pdf_{\chi^2}(\chi_0^2, df = 1)$$

452 The process is sketched in Figure 2 and leads to an alternative set of p-values from the  
453  $\chi^2$  test ( $P_{\chi^2}$ ). To establish which associations are significant according to the  $\chi^2$  test, we  
454 also calculated for this case the FDR=20% Benjamini-Hochberg adjusted threshold  
455 (0.00940155), that is

$$P_{\chi^2, ij} < 0.00940155$$

456 To facilitate reproducibility and the use of this methodology to analyse other  
457 pharmacogenomics data sets, the R script to calculate  $\phi$ ,  $\chi^2$  and  $P_{\chi^2}$  from  
458 `gdsc_manova_input_w1.csv` is available on request.

#### 459 **Benchmark to validate genomic markers on more recent GDSC data**

460 This benchmark is based on using more recent GDSC data as test sets. With this  
461 purpose, we downloaded new data from the latest release using the same experimental  
462 techniques to generate pharmacogenomic data and panel of selected genes as in  
463 release 1 (`gdsc_manova_input_w5.csv`). This release 5 contains 139 drugs tested on  
464 708 cell lines comprising 79,401  $\log IC_{50}$  values (80.7% of all possible drug-cell  
465 pairs). For the 127 drugs in common between releases 1 and 5, two non-overlapping  
466 data sets are generated per drug. Training sets using data in release 1 (the minimum,

467 average and maximum numbers of cell lines across training data sets are 237, 330 and  
468 467, respectively), along with their  $\log IC_{50}$ s for the considered drug. These sets were  
469 used to identify genomic markers as previously explained. Test sets contain the new  
470 cell lines tested with the drug in release 5 (the minimum, average and maximum  
471 numbers of cell lines in the test data sets are 42, 171 and 306, respectively). Thus, a  
472 total of 254 data sets were assembled and analysed for this study.

473 Thereafter, the significant drug-gene associations from each statistical test are  
474 evaluated on these test sets. Previously, a cell line sensitivity threshold was defined to  
475 discriminate between those resistant or sensitive to a given drug. For each drug, we  
476 calculated the threshold as the median of all the  $\log IC_{50}$  values from training set cell  
477 lines. Consequently, cell lines with  $\log IC_{50}$  lower than such threshold are sensitive to  
478 the drug of interest, whereas those with  $\log IC_{50}$  higher the threshold are resistant.  
479 Lastly, classification performance of a marker on its test set is summarised with the  
480 MCC (this is different from  $\phi$ , which has the same expression but uses a different  
481 threshold aimed instead at measuring the degree of separation between mutant and  
482 WT cell lines in the training set).

## 483 **Competing interests**

484 The authors declare that they have no competing interests.

## 485 **Availability of data and materials**

486 Data analysed in this paper was downloaded from releases 1.0 and 5.0 of the GDSC  
487 (<ftp://ftp.sanger.ac.uk/pub4/cancerrxgene/releases/>). All the results are compiled in  
488 the three additional files accompanying this paper.

## 489 **Ethics and consent statement**

490 Not applicable.

## 491 **Author contributions**

492 P.J.B. conceived the study, designed its implementation and wrote the manuscript.

493 C.C.D. implemented the software and carried out the numerical experiments with the

494 assistance of A.P. All authors discussed results and commented on the manuscript.

## 495 **Acknowledgements**

496 We thank Gustavo Stolovitzky (IBM Research, NY, USA) for early feedback on the

497 study. This work has been carried out thanks to the support of the A\*MIDEX grant

498 (n° ANR-11-IDEX-0001-02) funded by the French Government «Investissements

499 d’Avenir» programme.

## 500 **References**

501 1. Spear BB, Heath-Chiozzi M, Huff J: **Clinical application of pharmacogenetics.**

502 *Trends Mol Med* 2001, **7**:201–204.

503 2. Huang M, Shen A, Ding J, Geng M: **Molecularly targeted cancer therapy: some**

504 **lessons from the past decade.** *Trends Pharmacol Sci* 2014, **35**:41–50.

505 3. Luengo-Fernandez R, Leal J, Gray A, Sullivan R: **Economic burden of cancer**

506 **across the European Union: a population-based cost analysis.** *Lancet Oncol* 2013,

507 **14**:1165–74.

508 4. Deyati A, Younesi E, Hofmann-Apitius M, Novac N: **Challenges and**

509 **opportunities for oncology biomarker discovery.** *Drug Discov Today* 2013,

510 **18**:614–624.

511 5. Wheeler HE, Maitland ML, Dolan ME, Cox NJ, Ratain MJ: **Cancer**

512 **pharmacogenomics: strategies and challenges.** *Nat Rev Genet* 2013, **14**:23–34.

513 6. Hudson TJ, Anderson W, Artez A, Barker AD, Bell C, Bernabé RR, Bhan MK,

514 Calvo F, Eerola I, Gerhard DS, Gutmacher A, Guyer M, Hemsley FM, Jennings JL,

- 515 Kerr D, Klatt P, Kolar P, Kusada J, Lane DP, Laplace F, Youyong L, Nettekoven G,  
516 Ozenberger B, Peterson J, Rao TS, Remacle J, Schafer AJ, Shibata T, Stratton MR,  
517 Vockley JG, et al.: **International network of cancer genome projects.** *Nature* 2010,  
518 **464**:993–8.
- 519 7. McLeod HL: **Cancer Pharmacogenomics: Early Promise, But Concerted Effort**  
520 **Needed.** *Science (80- )* 2013, **339**:1563–1566.
- 521 8. Abaan OD, Polley EC, Davis SR, Zhu YJ, Bilke S, Walker RL, Pineda M, Gindin  
522 Y, Jiang Y, Reinhold WC, Holbeck SL, Simon RM, Doroshow JH, Pommier Y,  
523 Meltzer PS: **The exomes of the NCI-60 panel: a genomic resource for cancer**  
524 **biology and systems pharmacology.** *Cancer Res* 2013, **73**:4372–82.
- 525 9. Garnett MJ, Edelman EJ, Heidorn SJ, Greenman CD, Dastur A, Lau KW,  
526 Greninger P, Thompson IR, Luo X, Soares J, Liu Q, Iorio F, Surdez D, Chen L,  
527 Milano RJ, Bignell GR, Tam AT, Davies H, Stevenson JA, Barthorpe S, Lutz SR,  
528 Kogera F, Lawrence K, McLaren-Douglas A, Mitropoulos X, Mironenko T, Thi H,  
529 Richardson L, Zhou W, Jewitt F, et al.: **Systematic identification of genomic**  
530 **markers of drug sensitivity in cancer cells.** *Nature* 2012, **483**:570–575.
- 531 10. Barretina J, Caponigro G, Stransky N, Venkatesan K, Margolin AA, Kim S,  
532 Wilson CJ, Lehár J, Kryukov G V, Sonkin D, Reddy A, Liu M, Murray L, Berger MF,  
533 Monahan JE, Morais P, Meltzer J, Korejwa A, Jané-Valbuena J, Mapa FA, Thibault J,  
534 Bric-Furlong E, Raman P, Shipway A, Engels IH, Cheng J, Yu GK, Yu J, Aspesi P,  
535 Silva M de, et al.: **The Cancer Cell Line Encyclopedia enables predictive**  
536 **modelling of anticancer drug sensitivity.** *Nature* 2012, **483**:307–603.
- 537 11. Weinstein JN: **Drug discovery: Cell lines battle cancer.** *Nature* 2012, **483**:544–  
538 5.
- 539 12. Menden MP, Iorio F, Garnett M, McDermott U, Benes CH, Ballester PJ, Saez-

- 540 Rodriguez J: **Machine Learning Prediction of Cancer Cell Sensitivity to Drugs**  
541 **Based on Genomic and Chemical Properties.** *PLoS One* 2013, **8**:e61318.
- 542 13. Ammad-ud-din M, Georgii E, Gönen M, Laitinen T, Kallioniemi O, Wennerberg  
543 K, Poso A, Kaski S: **Integrative and personalized QSAR analysis in cancer by**  
544 **kernelized Bayesian matrix factorization.** *J Chem Inf Model* 2014, **54**:2347–59.
- 545 14. Cortés-Ciriano I, van Westen GJP, Bouvier G, Nilges M, Overington JP, Bender  
546 A, Malliavin TE: **Improved large-scale prediction of growth inhibition patterns**  
547 **using the NCI60 cancer cell line panel.** *Bioinformatics* 2016, **32**:85–95.
- 548 15. Riddick G, Song H, Ahn S, Walling J, Borges-Rivera D, Zhang W, Fine HA:  
549 **Predicting in vitro drug sensitivity using Random Forests.** *Bioinformatics* 2011,  
550 **27**:220–224.
- 551 16. Geeleher P, Cox NJ, Huang RS: **Clinical drug response can be predicted using**  
552 **baseline gene expression levels and in vitro drug sensitivity in cell lines.** *Genome*  
553 *Biol* 2014, **15**:R47.
- 554 17. Lee AC, Shedden K, Rosania GR, Crippen GM: **Data mining the NCI60 to**  
555 **predict generalized cytotoxicity.** *J Chem Inf Model* 2008, **48**:1379–88.
- 556 18. Kumar R, Chaudhary K, Singla D, Gautam A, Raghava GPS: **Designing of**  
557 **promiscuous inhibitors against pancreatic cancer cell lines.** *Sci Rep* 2014, **4**:4668.
- 558 19. Holbeck SL, Collins JM, Doroshow JH: **Analysis of Food and Drug**  
559 **Administration-approved anticancer agents in the NCI60 panel of human tumor**  
560 **cell lines.** *Mol Cancer Ther* 2010, **9**:1451–60.
- 561 20. Füllbeck M, Dunkel M, Hossbach J, Daniel PT, Preissner R: **Cellular**  
562 **Fingerprints: A Novel Approach Using Large-Scale Cancer Cell Line Data for**  
563 **the Identification of Potential Anticancer Agents.** *Chem Biol Drug Des* 2009,  
564 **74**:439–448.



- 565 21. Cheng T, Wang Y, Bryant SH: **Investigating the correlations among the**  
566 **chemical structures, bioactivity profiles and molecular targets of small**  
567 **molecules.** *Bioinformatics* 2010, **26**:2881–8.
- 568 22. **Genomics of Drug Sensitivity in Cancer**  
569 [<ftp://ftp.sanger.ac.uk/pub4/cancerrxgene/releases/>]
- 570 23. Benjamini Y, Hochberg Y: **Controlling the False Discovery Rate: A Practical**  
571 **and Powerful Approach to Multiple Testing.** *J R Stat Soc Ser B* 1995, **57**:289–300.
- 572 24. Malley JD, Dasgupta A, Moore JH: **The limits of p-values for biological data**  
573 **mining.** *BioData Min* 2013, **6**:10.
- 574 25. Motulsky HJ: **Common misconceptions about data analysis and statistics.** *J*  
575 *Pharmacol Exp Ther* 2014, **351**:200–5.
- 576 26. Nuzzo R: **Scientific method: Statistical errors.** *Nature* 2014, **506**:150–152.
- 577 27. Hoekstra R, Kiers HAL, Johnson A: **Are assumptions of well-known statistical**  
578 **techniques checked, and why (not)?** *Front Psychol* 2012, **3**:137.
- 579 28. **Wiley: Nonparametric Tests for Complete Data - Vilijandas Bagdonavièus,**  
580 **Julius Kruopis, Mikhail Nikulin**  
581 [<http://eu.wiley.com/WileyCDA/WileyTitle/productCd-1118601823.html>]
- 582 29. Sheskin DJ: **Handbook of Parametric and Nonparametric Statistical**  
583 **Procedures.** 2007.
- 584 30. Matthews BW: **Comparison of the predicted and observed secondary**  
585 **structure of T4 phage lysozyme.** *Biochim Biophys Acta - Protein Struct* 1975,  
586 **405**:442–451.
- 587 31. Chedzoy OB: **Phi-Coefficient.** In *Encyclopedia of Statistical Sciences.* John  
588 Wiley & Sons, Inc.; 2006.
- 589 32. Papadatos G, van Westen G, Croset S, Santos R, Trubian S, Overington JP: **A**

- 590 **document classifier for medicinal chemistry publications trained on the**  
591 **ChEMBL corpus.** *J Cheminform* 2014, **6**:40.
- 592 33. Vihinen M: **How to evaluate performance of prediction methods? Measures**  
593 **and their interpretation in variation effect analysis.** *BMC Genomics* 2012,  
594 **13**(Suppl 4):S2.
- 595 34. Smusz S, Kurczab R, Bojarski AJ: **The influence of the inactives subset**  
596 **generation on the performance of machine learning methods.** *J Cheminform* 2013,  
597 **5**:17.
- 598 35. Klepsch F, Vasanthanathan P, Ecker GF: **Ligand and structure-based**  
599 **classification models for prediction of P-glycoprotein inhibitors.** *J Chem Inf*  
600 *Model* 2014, **54**:218–29.
- 601 36. Kolchinsky A, Abi-Haidar A, Kaur J, Hamed AA, Rocha LM: **Classification of**  
602 **protein-protein interaction full-text documents using text and citation network**  
603 **features.** *IEEE/ACM Trans Comput Biol Bioinform* , **7**:400–11.
- 604 37. Poil S-S, de Haan W, van der Flier WM, Mansvelder HD, Scheltens P,  
605 Linkenkaer-Hansen K: **Integrative EEG biomarkers predict progression to**  
606 **Alzheimer’s disease at the MCI stage.** *Front Aging Neurosci* 2013, **5**:58.
- 607 38. Lever J, Krzywinski M, Altman N: **Points of Significance: Classification**  
608 **evaluation.** *Nat Methods* 2016, **13**:603–604.
- 609 39. de Gramont AA, Watson S, Ellis LM, Rodón J, Tabernero J, Hamilton SR:  
610 **Pragmatic issues in biomarker evaluation for targeted therapies in cancer.** *Nat*  
611 *Rev Clin Oncol* 2014, **advance on**.
- 612 40. Tran B, Dancey JE, Kamel-Reid S, McPherson JD, Bedard PL, Brown AMK,  
613 Zhang T, Shaw P, Onetto N, Stein L, Hudson TJ, Neel BG, Siu LL: **Cancer**  
614 **genomics: technology, discovery, and translation.** *J Clin Oncol* 2012, **30**:647–60.

- 615 41. Ahmed J, Meinel T, Dunkel M, Murgueitio MS, Adams R, Blasse C, Eckert A,  
616 Preissner S, Preissner R: **CancerResource: a comprehensive database of cancer-**  
617 **relevant proteins and compound interactions supported by experimental**  
618 **knowledge.** *Nucleic Acids Res* 2011, **39**(suppl 1):D960–D967.
- 619 42. Boutros PC, Margolin AA, Stuart JM, Califano A, Stolovitzky G: **Toward better**  
620 **benchmarking: challenge-based methods assessment in cancer genomics.** *Genome*  
621 *Biol* 2014, **15**:462.
- 622 43. Haibe-Kains B, El-Hachem N, Birkbak NJ, Jin AC, Beck AH, Aerts HJWL,  
623 Quackenbush J: **Inconsistency in large pharmacogenomic studies.** *Nature* 2013,  
624 **504**:389–93.
- 625 44. The Cancer Cell Line Encyclopedia Consortium, The Genomics of Drug  
626 Sensitivity in Cancer Consortium, Consortium TG of DS in CCLE, Consortium TG of  
627 DS in CCLE: **Pharmacogenomic agreement between two cancer cell line data**  
628 **sets.** *Nature* 2015, **528**:84–87.
- 629 45. Weinstein JN, Lorenzi PL: **Cancer: Discrepancies in drug sensitivity.** *Nature*  
630 2013, **504**:381–3.
- 631 46. Patel MN, Halling-Brown MD, Tym JE, Workman P, Al-Lazikani B: **Objective**  
632 **assessment of cancer genes for drug discovery.** *Nat Rev Drug Discov* 2013, **12**:35–  
633 50.
- 634 47. Pemovska T, Kontro M, Yadav B, Edgren H, Eldfors S, Szwajda A, Almusa H,  
635 Bespalov MM, Ellonen P, Elonen E, Gjertsen BTBT, Karjalainen R, Kuleskiy E,  
636 Lagström S, Lehto A, Lepistö M, Lundán T, Majumder MM, Lopez Marti JM, Mattila  
637 P, Murumägi A, Mustjoki S, Palva A, Parsons A, Pirttinen T, Rämetsä ME, Suvela M,  
638 Turunen L, Väström I, Wolf M, et al.: **Individualized Systems Medicine Strategy to**  
639 **Tailor Treatments for Patients with Chemorefractory Acute Myeloid Leukemia.**

- 640 *Cancer Discov* 2013;CD-13-0350.
- 641 48. Kamiyama H, Rauenzahn S, Shim JS, Karikari CA, Feldmann G, Hua L,  
642 Kamiyama M, Schuler FW, Lin M-T, Beaty RM, Karanam B, Liang H, Mullendore  
643 ME, Mo G, Hidalgo M, Jaffee E, Hruban RH, Jinnah HA, Roden RBS, Jimeno A, Liu  
644 JO, Maitra A, Eshleman JR: **Personalized Chemotherapy Profiling Using Cancer**  
645 **Cell Lines from Selectable Mice.** *Clin Cancer Res* 2013, **19**:1139–1146.
- 646 49. Williams SA, Anderson WC, Santaguida MT, Dylla SJ: **Patient-derived**  
647 **xenografts, the cancer stem cell paradigm, and cancer pathobiology in the 21st**  
648 **century.** *Lab Invest* 2013, **93**:970–82.
- 649 50. Gao H, Korn JM, Ferretti S, Monahan JE, Wang Y, Singh M, Zhang C, Schnell C,  
650 Yang G, Zhang Y, Balbin OA, Barbe S, Cai H, Casey F, Chatterjee S, Chiang DY,  
651 Chuai S, Cogan SM, Collins SD, Dammassa E, Ebel N, Embry M, Green J,  
652 Kauffmann A, Kowal C, Leary RJ, Lehar J, Liang Y, Loo A, Lorenzana E, et al.:  
653 **High-throughput screening using patient-derived tumor xenografts to predict**  
654 **clinical trial drug response.** *Nat Med* 2015, **21**:1318–25.
- 655 51. Simon R, Roychowdhury S: **Implementing personalized cancer genomics in**  
656 **clinical trials.** *Nat Rev Drug Discov* 2013, **12**:358–369.
- 657 52. Majumder B, Baraneedharan U, Thiyagarajan S, Radhakrishnan P, Narasimhan H,  
658 Dhandapani M, Brijwani N, Pinto DD, Prasath A, Shanthappa BU, Thayakumar A,  
659 Surendran R, Babu GK, Shenoy AM, Kuriakose MA, Bergthold G, Horowitz P, Loda  
660 M, Beroukhim R, Agarwal S, Sengupta S, Sundaram M, Majumder PK: **Predicting**  
661 **clinical response to anticancer drugs using an ex vivo platform that captures**  
662 **tumour heterogeneity.** *Nat Commun* 2015, **6**:6169.
- 663 53. Klijn C, Durinck S, Stawiski EW, Haverty PM, Jiang Z, Liu H, Degenhardt J,  
664 Mayba O, Gnad F, Liu J, Pau G, Reeder J, Cao Y, Mukhyala K, Selvaraj SK, Yu M,

665 Zynda GJ, Brauer MJ, Wu TD, Gentleman RC, Manning G, Yauch RL, Bourgon R,  
666 Stokoe D, Modrusan Z, Neve RM, de Sauvage FJ, Settleman J, Seshagiri S, Zhang Z:  
667 **A comprehensive transcriptional portrait of human cancer cell lines.** *Nat*  
668 *Biotechnol* 2014, **33**:306–12.

669 54. Makridakis M, Vlahou A: **Secretome proteomics for discovery of cancer**  
670 **biomarkers.** *J Proteomics* 2010, **73**:2291–305.

671 55. Costello JC, Heiser LM, Georgii E, Gönen M, Menden MP, Wang NJ, Bansal M,  
672 Ammad-Ud-Din M, Hintsanen P, Khan SA, Mpindi J-P, Kallioniemi O, Honkela A,  
673 Aittokallio T, Wennerberg K, Collins JJ, Gallahan D, Singer D, Saez-Rodriguez J,  
674 Kaski S, Gray JW, Stolovitzky G: **A community effort to assess and improve drug**  
675 **sensitivity prediction algorithms.** *Nat Biotechnol* 2014, **32**:1202–1212.

676 56. Potter NE, Ermini L, Papaemmanuil E, Cazzaniga G, Vijayaraghavan G, Titley I,  
677 Ford A, Campbell P, Kearney L, Greaves M: **Single-cell mutational profiling and**  
678 **clonal phylogeny in cancer.** *Genome Res* 2013.

679 57. Al-Lazikani B, Banerji U, Workman P: **Combinatorial drug therapy for cancer**  
680 **in the post-genomic era.** *Nat Biotechnol* 2012, **30**:679–92.

681

682

683

684

685

686

687

688 **Figures**

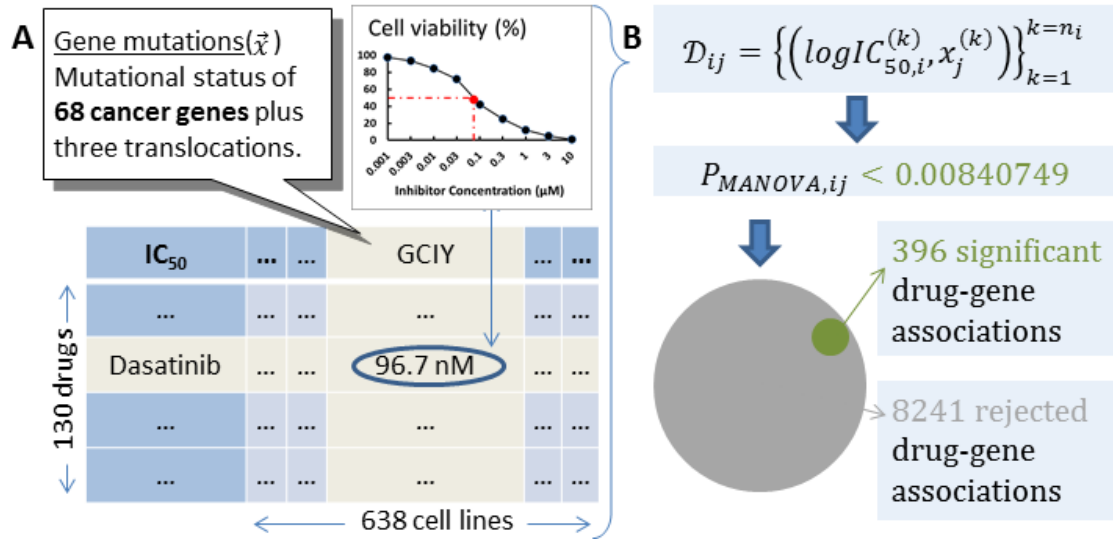

689  
690 **Fig 1. Released GDSC data.** (A) Garnett et al.[9] analysed a slightly different dataset  
691 than the one that was later released. In the released dataset, a panel of 130 drugs was  
692 tested against 638 cancer cell lines, leading to 47748 IC<sub>50</sub> values (57.6% of all  
693 possible drug-cell pairs). For each cell line, 68 cancer genes were sequenced and their  
694 mutational status determined, plus three translocations and a microsatellite instability  
695 status. (B) A dataset  $D_{ij}$  can be compiled for each drug-gene combination comprising  
696 the  $n_i$  cell responses to the  $i^{\text{th}}$  drug (in our case, each response as the logarithm base 10  
697 of IC<sub>50</sub> in  $\mu\text{M}$  units), with  $x_j^{(k)}$  being a binary variable indicating whether the  $j^{\text{th}}$  gene  
698 is mutated or not in the  $k^{\text{th}}$  cell line. Next, a p-value was calculated for each drug-gene  
699 pair using the MANOVA test. Those pairs with p-values below an adjusted threshold  
700 of 0.00840749 were considered statistically significant (396 of the 8637 drug-gene  
701 associations).

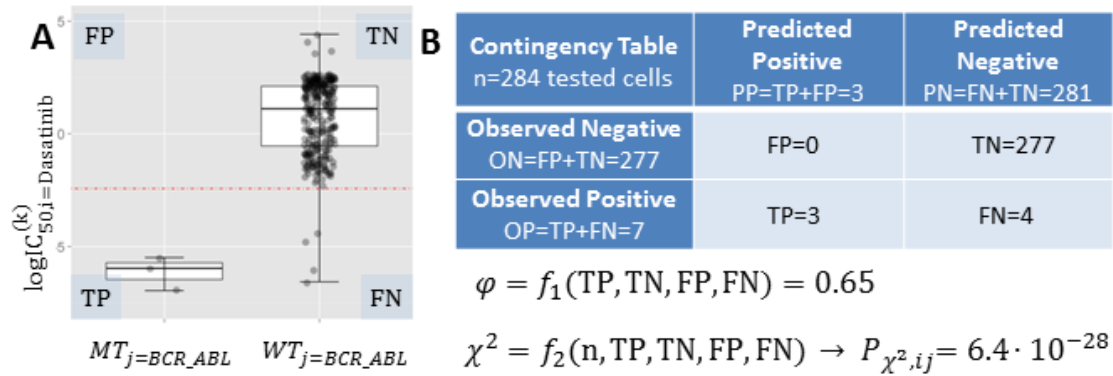

702  
703

**Fig 2. Measuring the discriminative power of a genomic marker with  $\phi$  and the**

704  **$\chi^2$  test.** (A) Scatter plot showing the logIC<sub>50</sub> of n=284 cell lines tested with the  
705 marketed drug Dasatinib. The left boxplot shows BCR\_ABL positive cell lines,  
706 whereas the boxplot on the right shows cell lines without this mutation (the median of  
707 each group appears as a black horizontal line within the boxplot). The red dotted line  
708 is the IC<sub>50</sub> threshold, which is defined as the mean of both medians. (B) Contingency  
709 table showing the number of cell lines in each of the four non-overlapping categories  
710 (TP, FN, FP, TN), where positives are cell lines below the threshold in the case of a  
711 sensitising mutation (above the threshold if the mutation induces resistance).  $\phi$  and  $\chi^2$   
712 are functions of these metrics and summarise binary classification performance, as  
713 further described in the Methods section. BCR\_ABL is a very strong marker of  
714 Dasatinib sensitivity as shown in the scatter plot and highlighted by both statistical  
715 tests ( $P_{MANOVA}=1.4 \cdot 10^{-10}$ ,  $P_{\chi^2}=6.4 \cdot 10^{-28}$ ), offering unusually high discrimination  
716 between cell lines according to their relative drug sensitivity ( $\phi=0.65$ ).

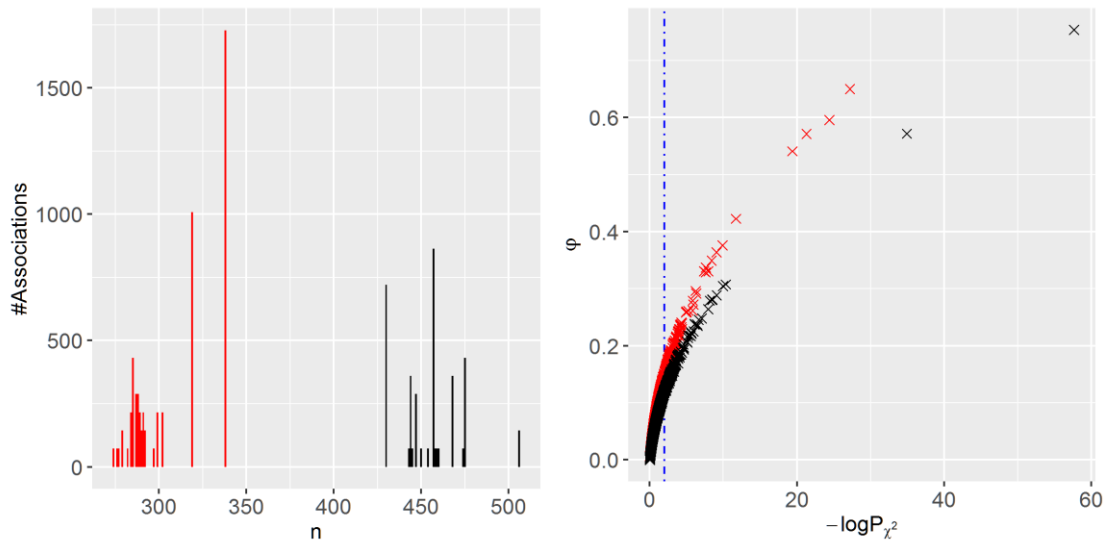

717

718 **Fig 3.  $\phi$  vs.  $-\log P_{\chi^2}$  across all the 8637 drug-gene associations from GDSC. (A)**

719 Number of drug-gene associations for each number of tested cell lines (n). Two

720 distinctive groups of drugs emerge: those tested on around 300 cell lines (red bars)

721 and those tested around 450 cell lines (black bars). (B)  $\phi$  versus  $-\log P_{\chi^2}$  across the

722 drug-gene associations (same colour code). The Spearman and Pearson correlations

723 between both metrics are 0.99 and 0.82, respectively. The vertical blue line marks the

724 significance cutoff for the  $\chi^2$  test. The plot shows that all markers with an  $\phi$  of 0.15 or

725 more are too discriminative to have arisen by chance (above an  $\phi$  of 0.12 if we restrict

726 to the markers evaluated with more data shown as black crosses).



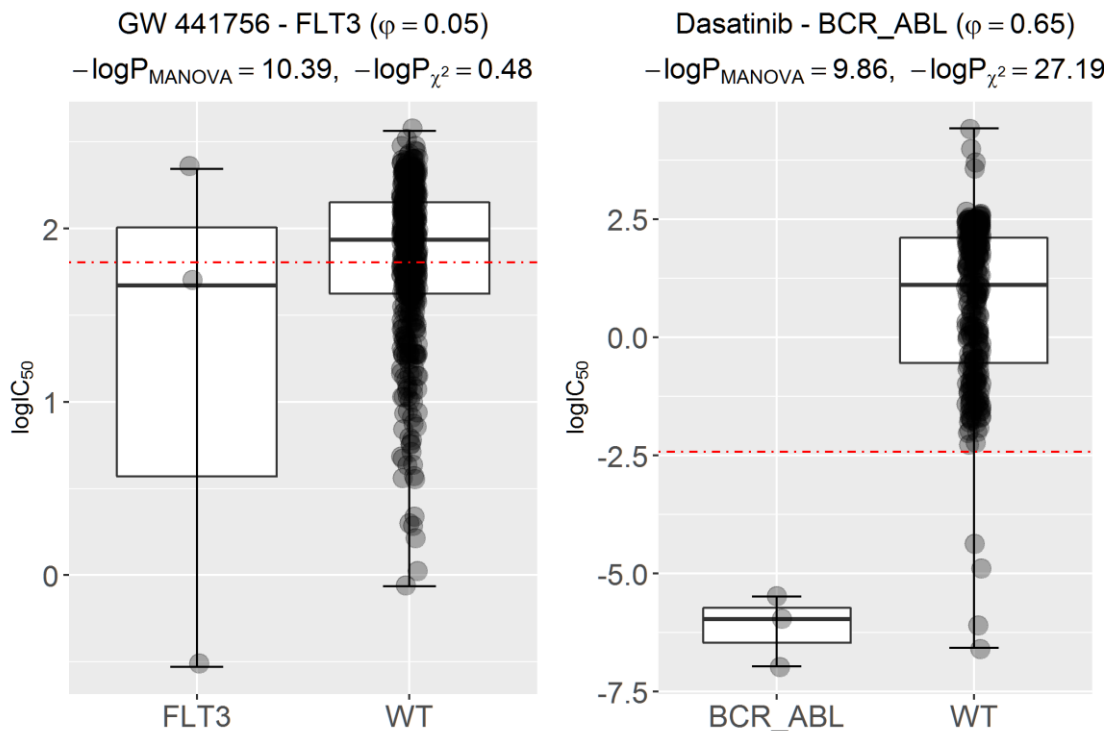

727

728 **Fig 4. Potential false-positive marker of the MANOVA test incorrectly rejected**

729 **by the  $\chi^2$  test. (left)** The scatter plot for the drug-gene association (GW441756-

730 FLT3) with the largest  $-\log P_{\text{MANOVA}}$  among those not significant according to the  $\chi^2$

731 test. Hence, mutated-FLT3 is a marker of sensitivity to the experimental drug

732 GW441756 according to the MANOVA test, but not according to the  $\chi^2$  test. In the

733 plotted training set, this marker offers practically no discriminative power as further

734 evidenced by a  $\phi$  of just 0.05 and similar drug response ( $\log \text{IC}_{50}$ ) distributions of

735 mutated and WT cell lines. However, this marker provides an MCC of 0.10 on the test

736 and hence this is a false negative of the  $\chi^2$  test. **(right)** Conversely, to assess the

737 consistency of the MANOVA test, we searched for the drug-gene association with

738 largest  $-\log P_{\chi^2}$  among those with a similar  $-\log P_{\text{MANOVA}}$  to that of GW441756-FLT3,

739 which is Dasatinib-BCR\_ABL. Whereas the p-value for Dasatinib-BCR\_ABL is of

740 the same magnitude as that for GW441756-FLT3 using the MANOVA test

741 ( $P_{\text{MANOVA}} \sim 10^{-10}$ ), the p-values for the same associations using the  $\chi^2$  test differ is

742 almost 27 orders of magnitude. Thus, unlike the  $\chi^2$  test, the MANOVA test is unable  
743 to detect the extreme difference in discriminative power offered by these two drug-  
744 gene associations. Indeed, the BCR\_ABL translocation is a highly discriminative  
745 marker of Dasatinib sensitivity ( $\phi=0.65$ ), as also evidenced by the barely overlapping  
746 drug response distributions from each set of cell lines. This is confirmed in the test  
747 set, where the Dasatinib-BCR\_ABL marker obtains an MCC of 0.21.  
748

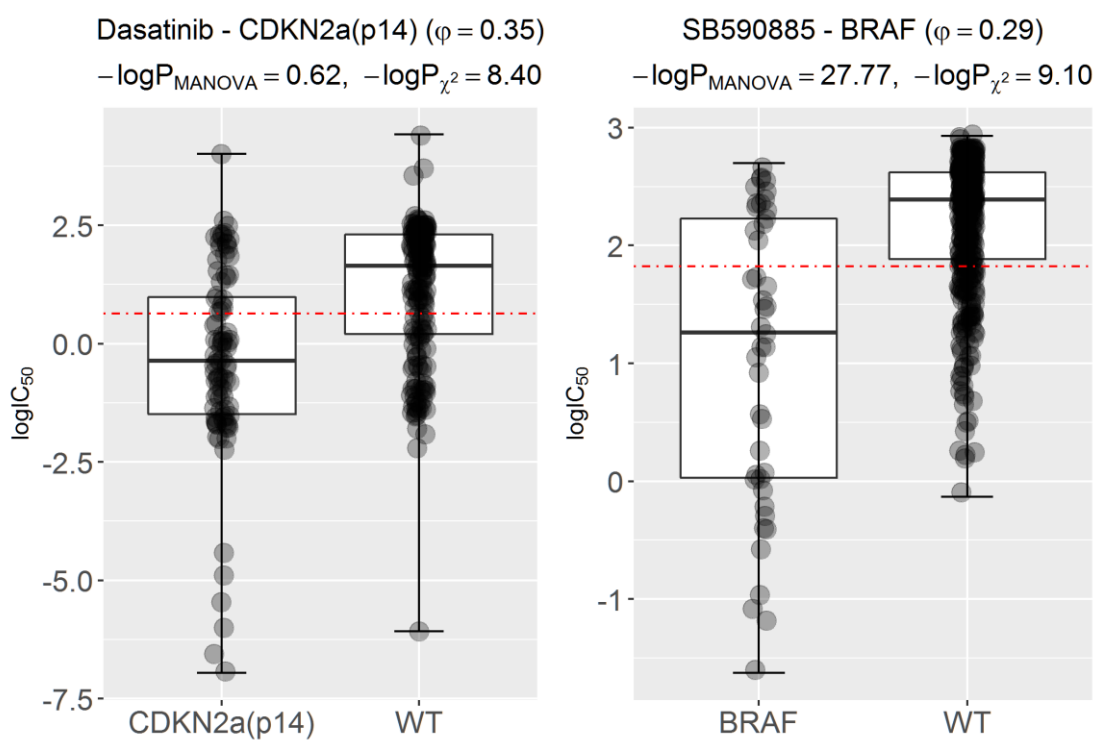

749 **Fig 5. Potential false-negative marker of the MANOVA test detected by the  $\chi^2$**   
750 **test. (left)** The scatter plot for the drug-gene association (Dasatinib-CDKN2a.p14)  
751 with the largest  $-\log P_{\chi^2}$  among those not significant according to the MANOVA test.  
752 Hence, mutated-CDKN2a.p14 is a potential marker of sensitivity to the marketed drug  
753 Dasatinib according to the  $\chi^2$  test, but not according to the MANOVA test. However,  
754 this marker has predictive value as it provides MCC=0.13 on the test set. Therefore,  
755 the  $\chi^2$  test detected this potential false negative of the MANOVA test. **(right)**

757 Conversely, to assess the consistency of the MANOVA test, we searched for the drug-  
758 gene association with largest  $-\log P_{\text{MANOVA}}$  among those with a similar  $-\log P_{\chi^2}$  to that  
759 of Dasatinib-CDKN2a.p14, which is SB590885-BRAF. Whereas the p-values for  
760 Dasatinib-CDKN2a.p14 and SB590885-BRAF differ in 27 orders of magnitude using  
761 the MANOVA test, the p-values for the same associations have similar p-values using  
762 the  $\chi^2$  test ( $P_{\chi^2} \sim 10^{-9}$ ). Thus, unlike the  $\chi^2$  test, the MANOVA test is unable to detect  
763 that both markers have similar discriminative power (SB590885-BRAF has a  $\phi$  of  
764 0.29 for 0.35 of Dasatinib-CDKN2a.p14). SB590885-BRAF is a true positive of both  
765 tests as its MCC on the test set is 0.27.  
766

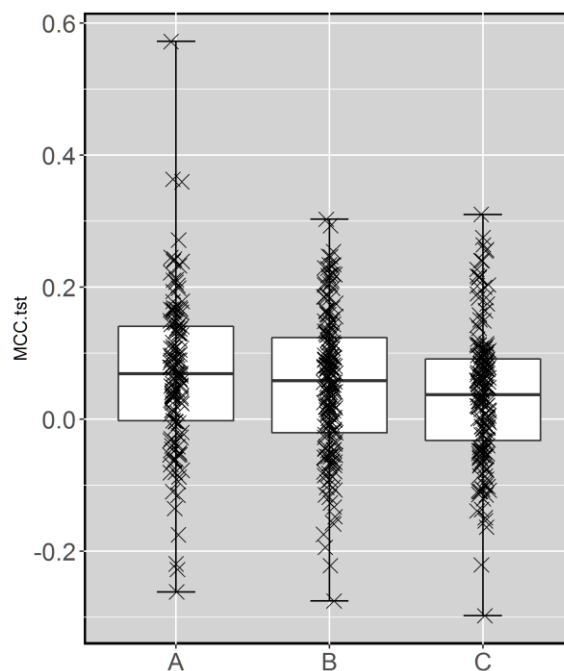

767  
768 **Fig 6. Test set performance of three methods to identify single-gene markers.**  
769 The methods are evaluated by their ability to correctly classify more recently-tested  
770 cell lines as sensitive or resistant to the considered drug via the MCC on the test set.  
771 There is no overlap between test sets and those employed to identify all drug-gene  
772 associations (training sets). The three compared methods are those based on the  $\chi^2$  test

773 (B), the MANOVA test (C) and their consensus (A; the association is significant if it  
774 is significant by both tests). We can see that the consensus method is the most  
775 predictive, followed by associations only significant with the  $\chi^2$  test (B) and those  
776 only significant by the MANOVA test (C). These results show that the overall  
777 predictive value of the markers revealed by the  $\chi^2$  test is higher than that arising from  
778 the MANOVA test and also that the consensus of both tests is more predictive than  
779 any of these two tests alone. While most of the markers provide better prediction than  
780 random classification (MCC=0), their generally low test set MCC values regardless of  
781 the employed detection method highlight how hard is to identify predictive markers of  
782 drug sensitivity.

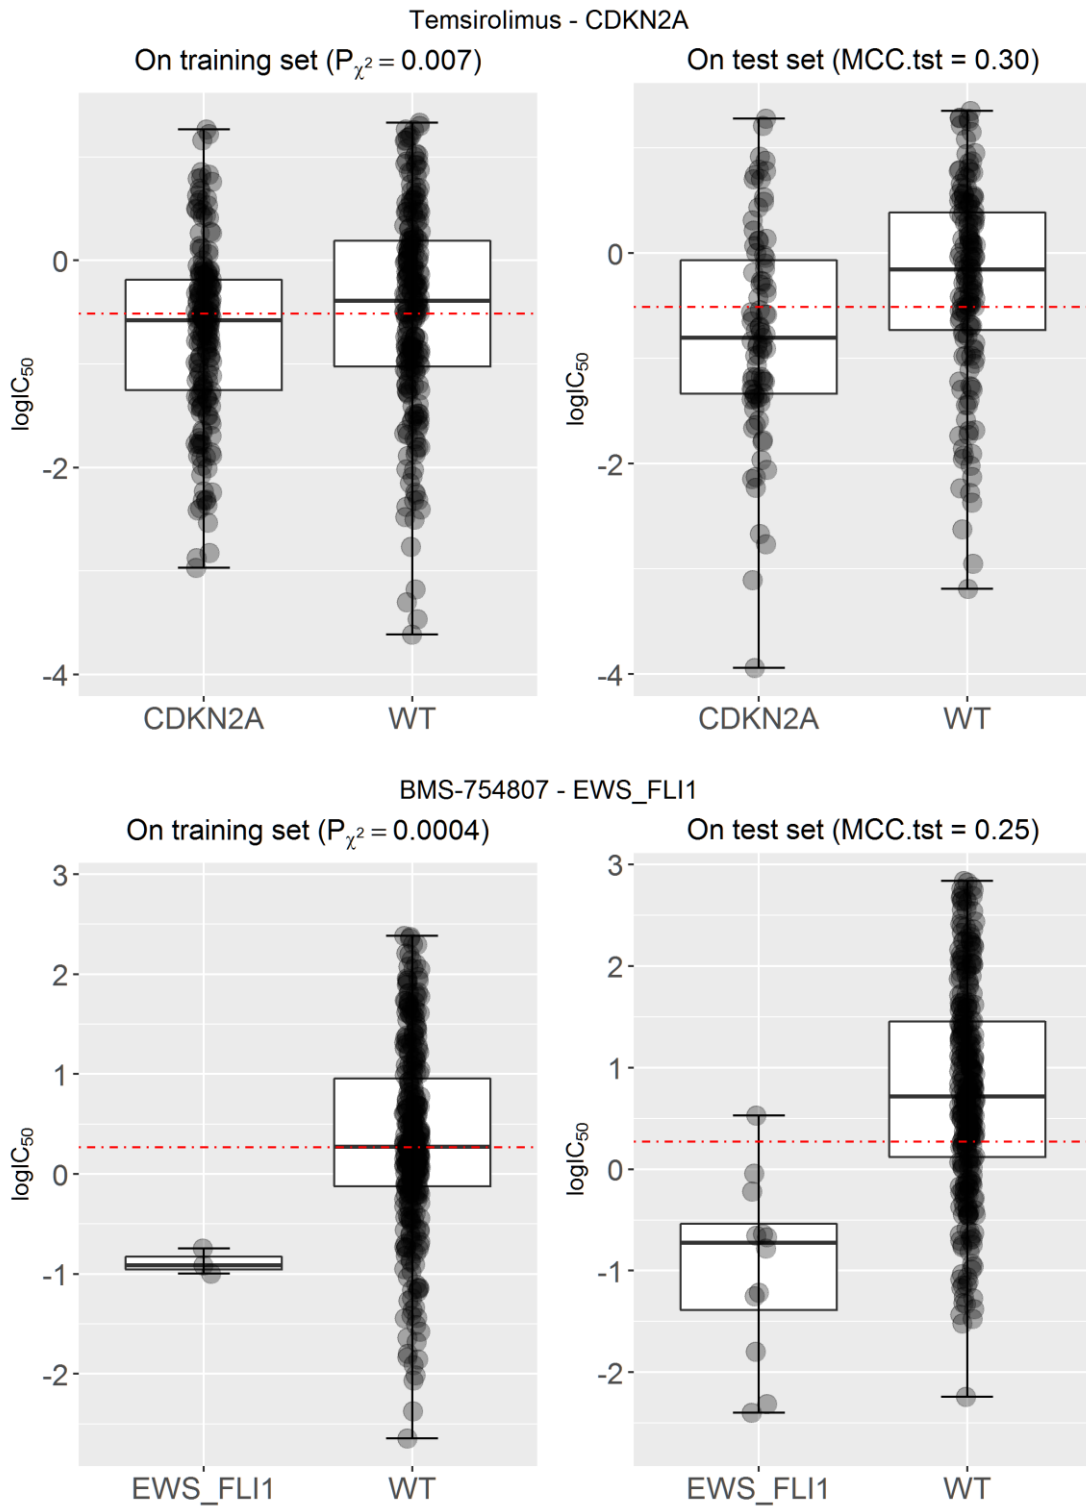

783

784 **Fig 7. Examples of new genomic markers for drugs with previously-**

785 **proposedMANOVA markers. (top)** The mutational status of the CDKN2A gene is

786 found to be the most discriminative marker for the approved drug Tamsirolimus

787 (MCC=0.30 on the test set,), which was missed by the MANOVA test  
788 ( $P_{\text{MANOVA}}=9 \cdot 10^{-3}$ ). **(bottom)** The EWS\_FLI1 translocation is found to be the most  
789 discriminative marker for the development drug BMS-754807 (MCC=0.25 on the test  
790 set), which was also missed by the MANOVA test ( $P_{\text{MANOVA}}=0.01$ ). While both tests  
791 are being applied to exactly the same data, only the  $\chi^2$  test could identify these  
792 confirmed false negatives of the MANOVA test.  
793

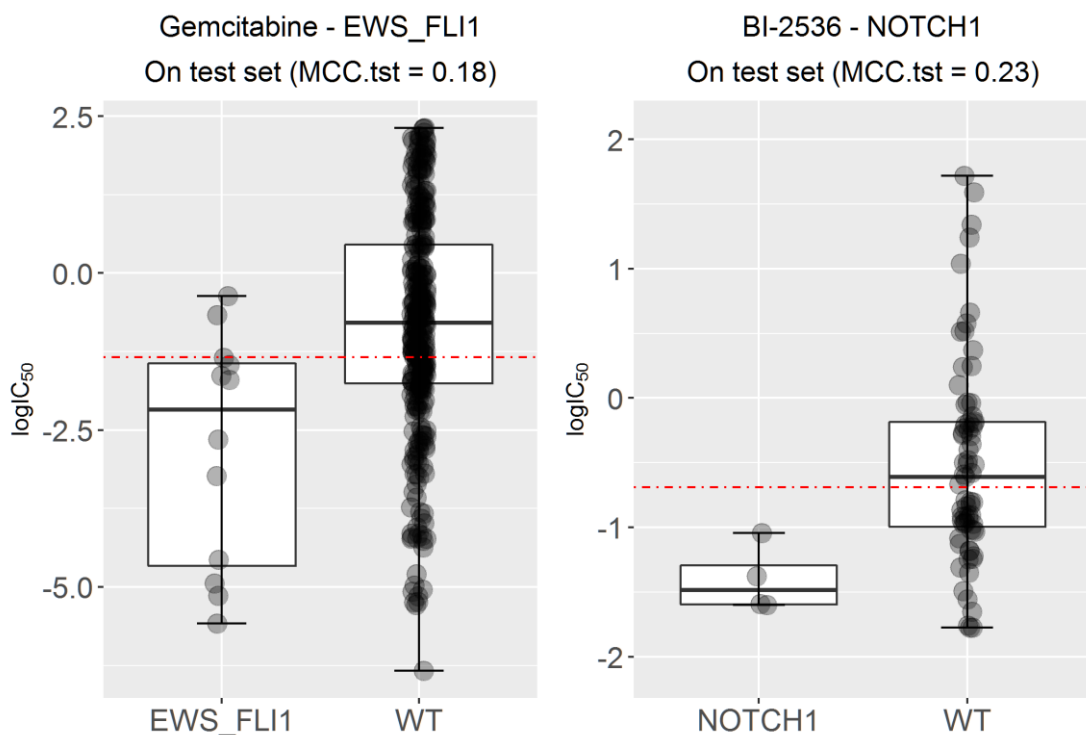

794  
795 **Fig 8. Examples of new genomic markers for drugs without previously-**  
796 **proposed known MANOVA markers. (left)** The EWS\_FLI1 translocation is found to  
797 be the most discriminative marker for the approved drug Gemcitabine (MCC=0.18 on  
798 the test set), which was missed by the MANOVA test ( $P_{\text{MANOVA}}=0.06$ ). **(right)** The  
799 mutational status of the NOTCH1 gene is found to be the most discriminative marker  
800 for the development drug BI-2536 (MCC=0.23 on the test set), which was also missed  
801 by the MANOVA test ( $P_{\text{MANOVA}}=0.03$ ).

802 **Additional files**

803 **Additional file 1 – results.127drugs.A-Consensus.xls**

804 Number of training cell lines (nTrain), prevalence of gene mutation, p-values, number  
805 of test set cell lines (nTest) and MCC on the test set (MCC.tst) for each significant  
806 drug-gene association from the consensus method evaluated on the test set.

807 **Additional file 2 – results.127drugs.B-ChiSquare.xls**

808 Number of training cell lines (nTrain), prevalence of gene mutation, p-values, number  
809 of test set cell lines (nTest) and MCC on the test set (MCC.tst) for each significant  
810 drug-gene association from the  $\chi^2$  test evaluated on the test set.

811 **Additional file 3 – results.127drugs.C-MANOVA.xls**

812 Number of training cell lines (nTrain), prevalence of gene mutation, p-values,  
813 number of test set cell lines (nTest) and MCC on the test set (MCC.tst) for each  
814 significant drug-gene association from the MANOVA test evaluated on the test set.
